# Supplementary material
Source: MDPI journal article supplement (https://www.mdpi.com/2073-4441/14/16/2576)
Supplement: s1 [file s1 › water-1871878-supplementary.pdf]

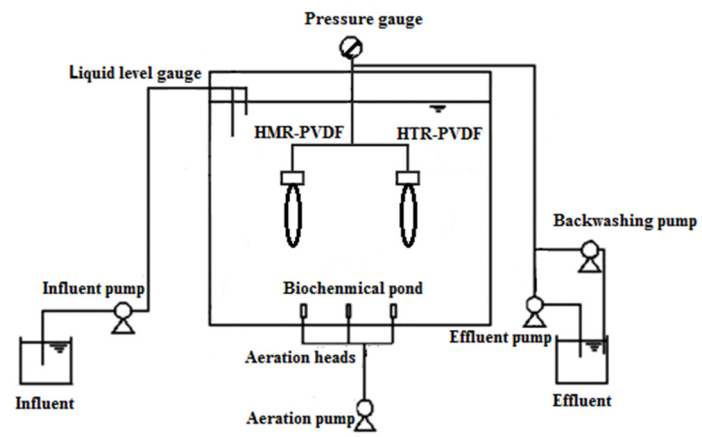

**Figure S1** The installation diagram of MBR system

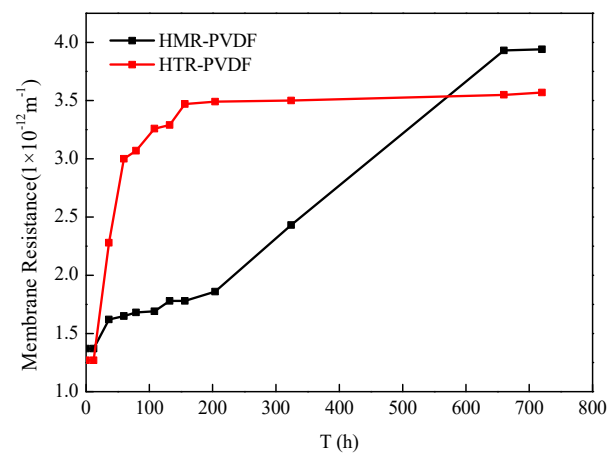

Figure S2. The change of membrane resistance during adsorption process

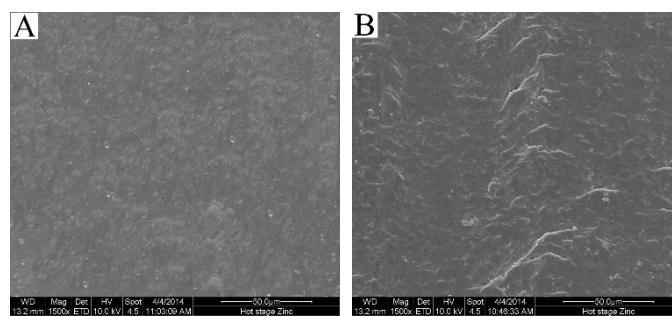

**Figure S3.** Outer surface SEM morphology of the HTR-PVDF membrane (A) initial, (B) adsorption

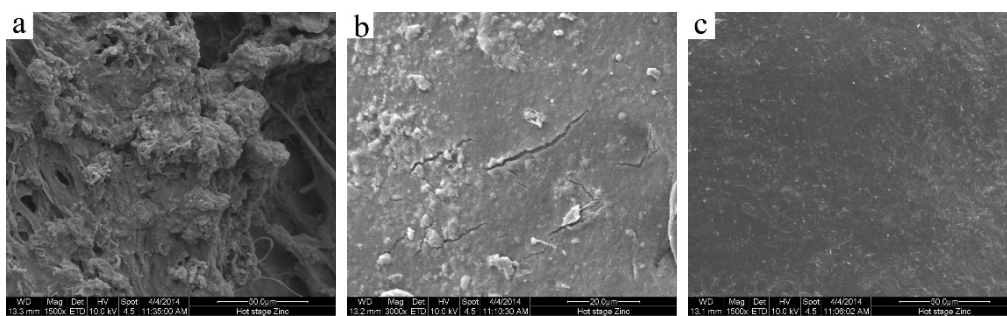

Figure S4. Outer surface SEM morphology of the HMR-PVDF membrane(a) initial, (b) cleaned with NaClO (20min) + citric acid (20min), (c) cleaned with citric acid (20min) + NaClO (20min)

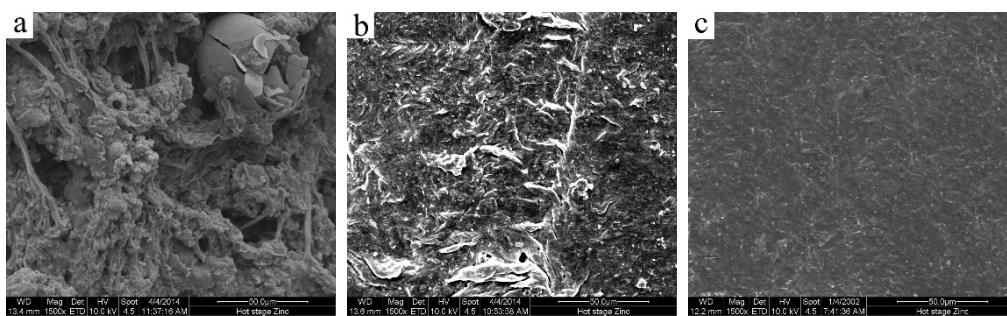

Figure S5. Outer surface SEM morphology of the HTR-PVDF membrane(a) initial, (b) cleaned with NaClO (60min) + critic acid (60min), (c) cleaned with critic acid (60min) + NaClO (60min)

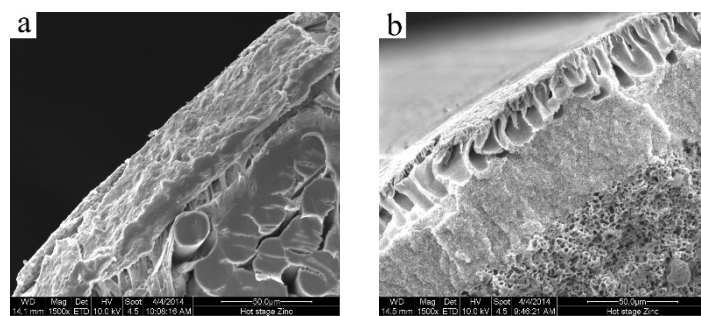

Figure S6. Cross-sectional SEM morphology of hollow fiber membranes (a) HTR-PVDF (b)HMR-PVDF
